# Supplementary material for: Electronic Tagging of Atlantic Bluefin Tuna (Thunnus thynnus, L.) Reveals Habitat Use and Behaviors in the Mediterranean Sea
Source: PubMed Central journal article supplement (PMC4324982; doi:10.1371/journal.pone.0116638), 2015-02-11

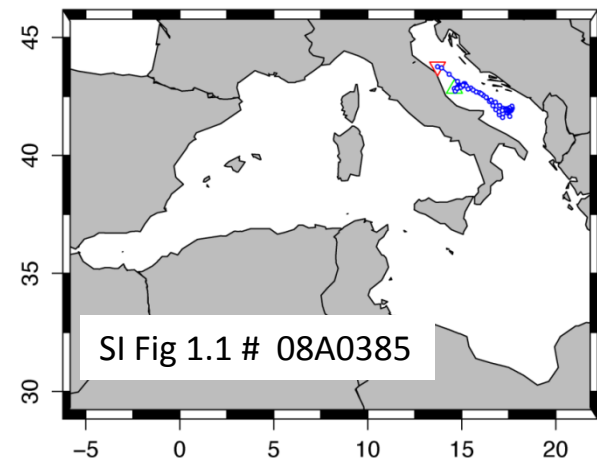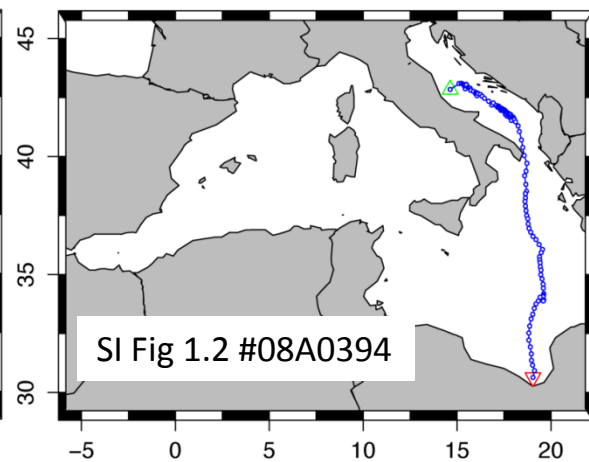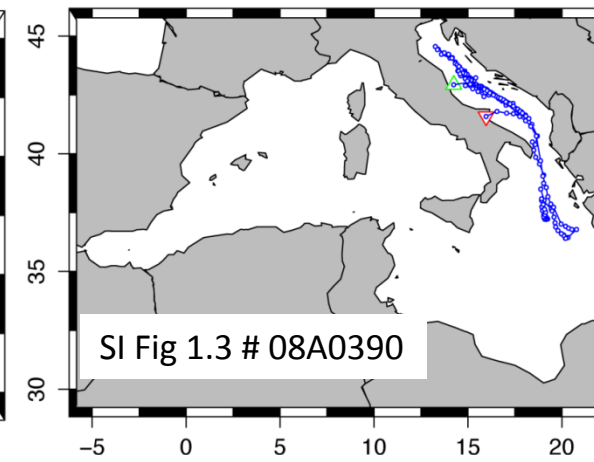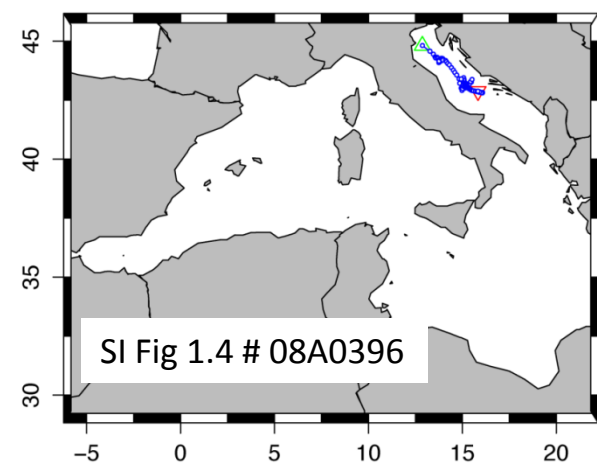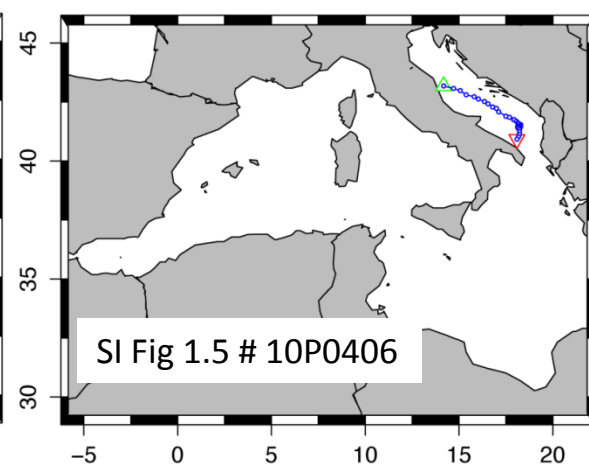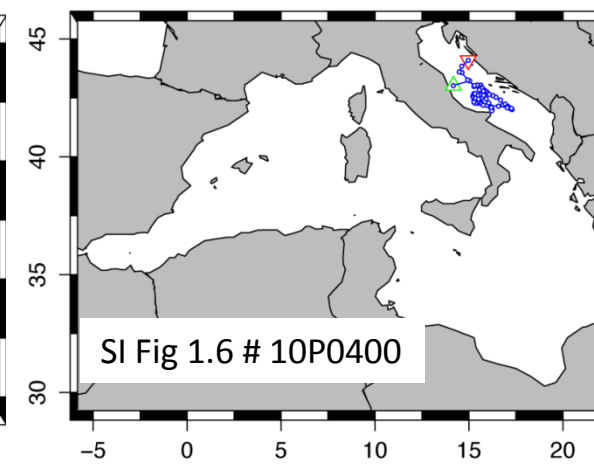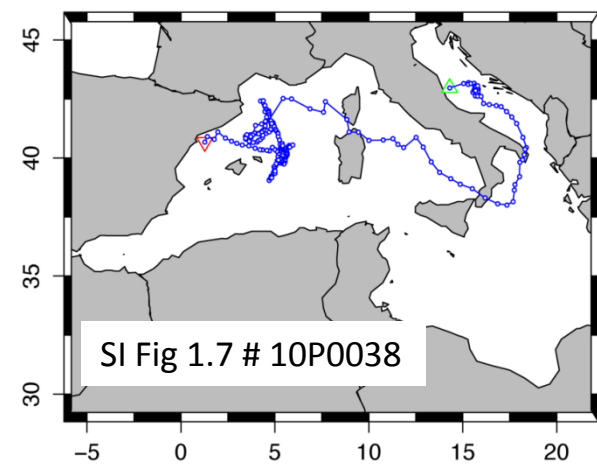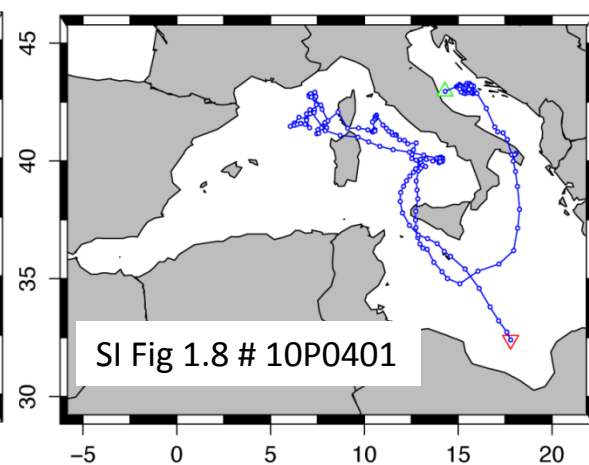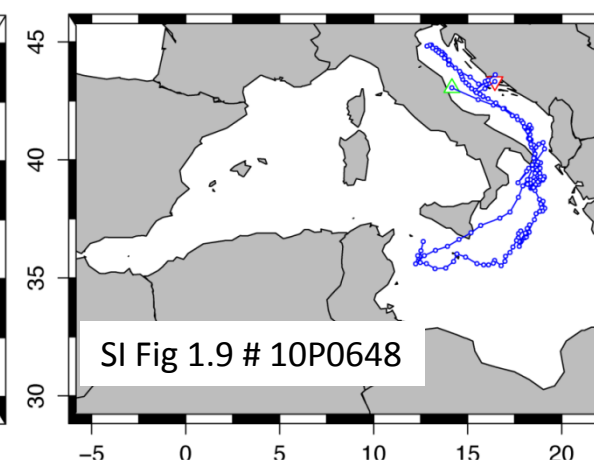

Supplement: pone.0116638.s001.pdf [file pone.0116638.s001.pdf]
